# Supplementary material for: Altered Spontaneous Brain Activity in Schizophrenia: A Meta-Analysis and a Large-Sample Study
Source: Hindawi journal article supplement (doi:10.1155/2015/204628), 2015-01-01
Supplement: f1 [file 204628.f1.pdf]

# Supplementary Materials

The coordinates of the meta-analysis and the results of ROI-based intergroup comparisons in ALFF/fALFF/ReHo are shown in Tables S1 and S2. We found that more than a half of ROIs with significant intergroup differences in ALFF/fALFF/ReHo in the meta-analysis also had significant intergroup differences in our sample ( $P < 0.05$ , uncorrected).

**Table S1.** The differences in ALFF/fALFF between schizophrenia patients and healthy controls in meta-analysis and ROIs analysis.

| Regions                 | Meta-analysis |     |     |     |                             | ROIs analysis       |                     |       |
|-------------------------|---------------|-----|-----|-----|-----------------------------|---------------------|---------------------|-------|
|                         | Voxels        | MNI |     |     | Peak Intensity <sup>1</sup> | Patients (mean ±SD) | Controls (mean ±SD) | P     |
|                         |               | X   | Y   | Z   |                             |                     |                     |       |
| <i>Increased in SCZ</i> |               |     |     |     |                             |                     |                     |       |
| *L-ITG                  | 167           | -52 | -6  | -46 | 3.43                        | 0.53 ±0.19          | 0.48 ±0.18          | 0.051 |
| L-ITG/MTG               | 472           | -54 | -28 | -18 | 3.72                        | 0.90 ±0.20          | 0.85 ±0.18          | 0.069 |
| *R-HP                   | 320           | 32  | -6  | -20 | 3.72                        | 0.82 ±0.13          | 0.76 ±0.11          | 0.001 |
| *R-OL                   | 250           | 16  | 8   | -22 | 3.43                        | 0.70 ±0.17          | 0.62 ±0.13          | 0.001 |
| *R-MTG                  | 191           | 68  | -34 | -16 | 3.22                        | 1.10 ±0.31          | 1.07 ±0.33          | 0.464 |
| L-HP                    | 936           | -30 | -10 | -16 | 3.43                        | 0.72 ±0.08          | 0.64 ±0.07          | 0.001 |
| *L-Rec                  | 320           | -12 | 20  | -16 | 3.72                        | 0.68 ±0.13          | 0.61 ±0.11          | 0.001 |
| L-OFC                   | 624           | -6  | 58  | -16 | 3.72                        | 1.33 ±0.29          | 1.28 ±0.29          | 0.231 |
| *L-HP                   | 315           | -4  | -6  | -12 | 3.72                        | 1.20 ±0.39          | 0.97 ±0.20          | 0.001 |
| L-INS/Put               | 1545          | -28 | -12 | 12  | 3.72                        | 0.79 ±0.08          | 0.75 ±0.08          | 0.001 |
| R-IFG                   | 618           | 48  | 42  | 2   | 3.72                        | 1.30 ±0.23          | 1.22 ±0.21          | 0.014 |
| *L-IOG                  | 341           | -36 | -72 | -6  | 5.06                        | 0.76 ±0.15          | 0.80 ±0.16          | 0.048 |
| L-IFG                   | 591           | -42 | 36  | -4  | 3.72                        | 1.28 ±0.23          | 1.24 ±0.23          | 0.171 |
| Bi_ACC                  | 639           | 0   | 40  | -2  | 3.72                        | 1.04 ±0.16          | 1.02 ±0.19          | 0.443 |
| *R-SFG                  | 161           | 26  | 68  | -4  | 3.22                        | 1.26 ±0.36          | 1.20 ±0.39          | 0.207 |
| *R-Cal                  | 320           | 18  | -94 | 0   | 3.72                        | 1.01 ±0.31          | 1.27 ±0.39          | 0.001 |
| R-Put/INS               | 1731          | 48  | 8   | 6   | 3.72                        | 0.88 ±0.08          | 0.85 ±0.09          | 0.051 |
| *R-MOG                  | 274           | 38  | -82 | 8   | 3.22                        | 1.00 ±0.30          | 1.04 ±0.20          | 0.230 |
| R-ACC/SFG               | 1095          | 12  | 42  | 24  | 5.06                        | 1.11 ±0.16          | 1.05 ±0.17          | 0.007 |
| *L-SFG                  | 156           | -18 | 72  | 8   | 3.72                        | 0.99 ±0.30          | 1.10 ±0.29          | 0.021 |
| *L-IPL                  | 320           | -48 | -52 | 42  | 3.72                        | 1.57 ±0.35          | 1.69 ±0.31          | 0.010 |
| <i>Decreased in SCZ</i> |               |     |     |     |                             |                     |                     |       |
| R-SFG                   | 326           | 14  | 44  | -24 | 3.08                        | 0.84 ±0.27          | 0.83 ±0.36          | 0.752 |
| L-Fus                   | 314           | -30 | -78 | -18 | 4.36                        | 0.89 ±0.24          | 0.92 ±0.25          | 0.190 |
| *L-Rec                  | 140           | 0   | 62  | -18 | 3.48                        | 1.26 ±0.35          | 1.23 ±0.37          | 0.488 |
| *L-SFG                  | 144           | -18 | 62  | -16 | 3.08                        | 0.59 ±0.24          | 0.54 ±0.19          | 0.119 |

|                   |      |     |     |     |      |            |            |       |
|-------------------|------|-----|-----|-----|------|------------|------------|-------|
| <b>*R-IOG</b>     | 148  | 36  | -88 | -12 | 3.48 | 0.87 ±0.29 | 1.00 ±0.27 | 0.001 |
| <b>R-LG/Cal</b>   | 1824 | 8   | -74 | -6  | 4.36 | 0.96 ±0.18 | 1.14 ±0.24 | 0.001 |
| <b>*R-INS</b>     | 150  | 42  | 8   | -12 | 3.48 | 1.37 ±0.20 | 1.34 ±0.25 | 0.408 |
| <b>L-LG</b>       | 280  | -10 | -88 | -8  | 3.08 | 0.96 ±0.30 | 1.19 ±0.43 | 0.001 |
| <b>*L-OFC</b>     | 160  | -10 | 38  | -10 | 2.96 | 0.75 ±0.18 | 0.71 ±0.17 | 0.095 |
| <b>L-MOG</b>      | 285  | -36 | -84 | 0   | 4.36 | 0.89 ±0.20 | 0.97 ±0.21 | 0.006 |
| <b>*R-MTG</b>     | 139  | 50  | -70 | 0   | 3.08 | 1.06 ±0.27 | 1.24 ±0.40 | 0.001 |
| <b>L-STG</b>      | 290  | -66 | -18 | 6   | 4.36 | 1.16 ±0.24 | 1.15 ±0.24 | 0.938 |
| <b>L-MOG</b>      | 280  | -16 | -92 | 10  | 4.36 | 0.91 ±0.25 | 1.01 ±0.26 | 0.012 |
| <b>*L-Cal</b>     | 171  | -22 | -58 | 4   | 4.36 | 0.90 ±0.22 | 0.98 ±0.30 | 0.032 |
| <b>R-STG</b>      | 290  | 56  | -22 | 6   | 3.08 | 1.41 ±0.28 | 1.50 ±0.30 | 0.011 |
| <b>L-INS</b>      | 428  | -40 | -14 | 4   | 3.48 | 0.93 ±0.18 | 0.87 ±0.13 | 0.014 |
| <b>*L-LG</b>      | 160  | -4  | -76 | 4   | 2.96 | 1.32 ±0.42 | 1.65 ±0.57 | 0.001 |
| <b>*R-Cau</b>     | 150  | 22  | 26  | 8   | 3.48 | 0.59 ±0.08 | 0.56 ±0.10 | 0.016 |
| <b>*R-Pcu</b>     | 150  | 6   | -54 | 14  | 3.48 | 1.68 ±0.36 | 1.73 ±0.38 | 0.543 |
| <b>R-SOG/Cun</b>  | 784  | 6   | -82 | 16  | 3.48 | 1.25 ±0.27 | 1.38 ±0.29 | 0.001 |
| <b>*R-Pcu</b>     | 152  | 30  | -62 | 18  | 3.08 | 0.73 ±0.15 | 0.71 ±0.13 | 0.298 |
| <b>*L-STG</b>     | 150  | -50 | -36 | 20  | 3.48 | 1.11 ±0.32 | 0.99 ±0.21 | 0.002 |
| <b>*R-Cau</b>     | 152  | 18  | 6   | 18  | 3.08 | 0.66 ±0.12 | 0.60 ±0.10 | 0.001 |
| <b>L-SOG</b>      | 450  | -18 | -90 | 34  | 4.36 | 1.09 ±0.29 | 1.15 ±0.24 | 0.127 |
| <b>*R-IFG</b>     | 150  | 48  | 12  | 20  | 3.48 | 1.23 ±0.25 | 1.31 ±0.25 | 0.034 |
| <b>*L-Cun</b>     | 104  | -6  | -96 | 22  | 2.96 | 0.95 ±0.31 | 1.04 ±0.29 | 0.061 |
| <b>*R-Cau</b>     | 160  | 22  | -12 | 24  | 2.96 | 0.60 ±0.95 | 0.54 ±0.08 | 0.001 |
| <b>*R-post_CG</b> | 160  | 50  | -12 | 24  | 2.95 | 0.99 ±0.22 | 1.08 ±0.27 | 0.020 |
| <b>*R-preCG</b>   | 160  | 60  | 2   | 26  | 4.36 | 0.99 ±0.26 | 1.09 ±0.35 | 0.027 |
| <b>*R-Pcu</b>     | 152  | 4   | -70 | 26  | 3.08 | 1.97 ±0.50 | 2.18 ±0.45 | 0.004 |
| <b>*L-post_CG</b> | 150  | -52 | -12 | 42  | 3.48 | 1.02 ±0.29 | 1.11 ±0.25 | 0.032 |
| <b>R-preCG</b>    | 554  | 54  | -12 | 42  | 4.36 | 0.99 ±0.22 | 1.08 ±0.21 | 0.004 |
| <b>*R-SPL</b>     | 109  | 14  | -80 | 50  | 3.08 | 1.05 ±0.10 | 1.13 ±0.11 | 0.001 |
| <b>R-post_CG</b>  | 581  | 36  | -28 | 48  | 3.48 | 0.86 ±0.23 | 0.96 ±0.24 | 0.004 |
| <b>*R-IPL</b>     | 122  | 44  | -54 | 50  | 3.08 | 1.78 ±0.44 | 2.03 ±0.60 | 0.001 |
| <b>*L-IPL</b>     | 152  | -42 | -52 | 50  | 3.08 | 1.59 ±0.37 | 1.64 ±0.33 | 0.148 |
| <b>L- post_CG</b> | 364  | -36 | -36 | 56  | 3.48 | 0.91 ±0.19 | 0.98 ±0.21 | 0.014 |
| <b>*L-MFG</b>     | 152  | -24 | 8   | 56  | 3.08 | 1.14 ±0.25 | 1.18 ±0.25 | 0.302 |
| <b>*R- PCL</b>    | 150  | 2   | -36 | 60  | 3.48 | 0.93 ±0.21 | 1.05 ±0.28 | 0.003 |
| <b>*L-Pcu</b>     | 140  | 0   | -54 | 62  | 3.48 | 1.67 ±0.48 | 1.69 ±0.35 | 0.789 |

1 Peak Intensity is the value of (-log<sub>10</sub>(P)).

\* Those results composed of only one circle respectively.

Abbreviations: L, left; R, right; Bi, bilateral; ITG, inferior temporal gyrus; MTG, middle temporal gyrus; HP, hippocampus; OL, olfactory lobe; Rec, rectus; OFC, orbitofrontal cortex; INS, insula; Put, putamen; IFG, inferior frontal gyrus; IOG, inferior occipital gyrus; ACC, anterior cingulate cortex; SFG, superior frontal gyrus; Cal, calcarine; MOG, middle occipital gyrus; IPL, inferior parietal lobule; Fus, fusiform; LG, lingual gyrus; STG, superior temporal gyrus; SOG, superior occipital gyrus; Cun, cuneus; Cau, caudate; preCG, precentral gyrus; post\_CG, postcentral gyrus;

Pcu, precuneus; SPL, superior parietal lobule; MFG, middle frontal gyrus; PCL, paracentral lobule.

**Table S2.** The differences in ReHo between schizophrenia patients and healthy controls in meta-analysis and ROIs analysis.

| Regions                 | Meta-analysis |     |     |     |                             | ROIs analysis       |                     |       |
|-------------------------|---------------|-----|-----|-----|-----------------------------|---------------------|---------------------|-------|
|                         | Voxels        | MNI |     |     | Peak Intensity <sup>1</sup> | Patients (mean ±SD) | Controls (mean ±SD) | P     |
|                         |               | X   | Y   | Z   |                             |                     |                     |       |
| <i>Increased in SCZ</i> |               |     |     |     |                             |                     |                     |       |
| <b>*R-INS</b>           | 1498          | 48  | 12  | 0   | 5.36                        | 1.03 ±0.09          | 1.03 ±0.10          | 0.772 |
| <b>*L-IFG</b>           | 1472          | -52 | 2   | 8   | 3.40                        | 0.94 ±0.07          | 0.95 ±0.09          | 0.282 |
| <b>L-ACC</b>            | 3681          | -10 | 36  | 18  | 4.88                        | 1.13 ±0.08          | 1.10 ±0.08          | 0.019 |
| <i>Decreased in SCZ</i> |               |     |     |     |                             |                     |                     |       |
| <b>*R-ITG</b>           | 442           | 48  | 0   | -42 | 5.06                        | 0.68 ±0.13          | 0.63 ±0.11          | 0.008 |
| <b>*L-ITG</b>           | 531           | -34 | 6   | -40 | 3.59                        | 0.65 ±0.10          | 0.61 ±0.08          | 0.001 |
| <b>L-PH/L-HP</b>        | 1003          | -18 | -10 | -24 | 4.02                        | 0.80 ±0.09          | 0.76 ±0.07          | 0.001 |
| <b>L-MOG/IOG</b>        | 1546          | -46 | -76 | -18 | 3.59                        | 1.04 ±0.10          | 1.07 ±0.10          | 0.008 |
| <b>L-Rec/ACC</b>        | 1933          | -12 | 44  | -18 | 4.02                        | 0.93 ±0.15          | 0.93 ±0.16          | 0.872 |
| <b>R-ITG/ IOG</b>       | 694           | 48  | -78 | -16 | 4.02                        | 0.98 ±0.12          | 1.06 ±0.13          | 0.001 |
| <b>*R-SFG</b>           | 341           | 20  | 68  | 2   | 3.28                        | 1.03 ±0.19          | 1.03 ±0.16          | 0.706 |
| <b>R-MOG</b>            | 264           | 48  | -78 | 6   | 5.06                        | 1.09 ±0.15          | 1.15 ±0.15          | 0.002 |
| <b>L-STG</b>            | 1413          | -66 | -22 | 6   | 4.02                        | 0.90 ±0.08          | 0.92 ±0.07          | 0.091 |
| <b>*R-MTG</b>           | 376           | 62  | -46 | 8   | 3.28                        | 1.15 ±0.15          | 1.11 ±0.14          | 0.082 |
| <b>*L-post_CG</b>       | 577           | -58 | -10 | 36  | 3.59                        | 0.96 ±0.14          | 1.04 ±0.14          | 0.001 |
| <b>R-SOG</b>            | 402           | 20  | -84 | 36  | 4.02                        | 1.09 ±0.14          | 1.15 ±0.15          | 0.011 |
| <b>R-post_CG</b>        | 547           | 44  | -12 | 62  | 3.59                        | 1.11 ±0.16          | 1.14 ±0.16          | 0.001 |
| <b>*R-SPL</b>           | 390           | 24  | -60 | 62  | 4.02                        | 1.14 ±0.16          | 1.15 ±0.13          | 0.336 |
| <b>R-PCL/Pcu</b>        | 741           | 6   | -40 | 62  | 3.59                        | 0.94 ±0.12          | 0.98 ±0.14          | 0.126 |

<sup>1</sup> Peak Intensity is the value of (-log<sub>10</sub>(P)).

\* Those results composed of only one circle respectively.

Abbreviations: L, left; R, right; INS, insula; IFG, inferior frontal gyrus; ACC, anterior cingulate cortex; ITG, inferior temporal gyrus; PH, paraHippocampus; HP, hippocampus; MOG, middle occipital gyrus; MTG, middle temporal gyrus; IOG, inferior occipital gyrus; Rec, rectus; SFG, superior frontal gyrus; STG, superior temporal gyrus; SOG, superior occipital gyrus; post\_CG, postcentral gyrus; preCG, precentral gyrus; SPL, superior parietal lobule; PCL, paracentral lobule; Pcu, precuneus.
